# Supplementary material for: Signaling Logic of Activity-Triggered Dendritic Protein Synthesis: An mTOR Gate But Not a Feedback Switch
Source: PLoS Comput Biol. 2009 Feb 13;5(2):e1000287. doi: 10.1371/journal.pcbi.1000287 (PMC2647780; doi:10.1371/journal.pcbi.1000287)
Supplement: Dataset S1 — Parameters source and notes. (0.72 MB XLS) [file pcbi.1000287.s001.xls]

## Sheet: Sheet1
Parameters
BDNF Receptor Signaling
Molecule	Concentration	Buffered	Notes
BDNF	0.1 nM	Yes	Assumed (This concentration is in the range required for activation of TrKB receptors [1].)
TrKB	0.25 uM	No	TrkB expression is at comparable levels to endogenous TrkA [2]. There are around 130000 TrKA molecules on the plasma membrane [3].
Int_BDNF_TrKB2*_clx	0.25 uM	Yes	Assumed
Shc	0.5 uM	No	DOQCS
PLC-γ	0.1 uM	No	DOQCS
PLC-γ_basal	0.0007 uM	No	We had set it to get a reasonable basal value of phosphorylated PLC-γ.
Grb2	1 uM	No	DOQCS
Gab1	0.7 uM	No	[4]
PI3K	0.1 uM	No	[5]
PIP2	7 uM	Yes	[6]
PTEN	0.27 uM	No	15 ug/ml [7]
PI3K	0.1 uM	No	[5]
PIP2	7 uM	Yes	[6]
	Specification		Binding/Enzymatic Reaction	Rates	Notes
1)	Ligand Binding		BDNF + TrKB -> BDNF_TrKB_clx	kf =1 /sec/uM, kb =0.05 /sec	The reaction is set up to obtain 50% of maximum of TrKB phosphorylation. (Kd = 50 ng/ml (0.0018 uM) [8,9])
2)	Receptor dimerization		BDNF_TrKB_clx + TrKB -> BDNF_TrKB2_clx	kf = 1 /sec/uM and kb = 0.02 /sec	After binding of BDNF to TrKB the affinity of another TrKB for BDNF increases [10].
3)	Autophosphorylation		BDNF_TrKB2_clx -> BDNF_TrKB2*_clx	kf = 0.02 /sec kb = 0 /sec	Above all three reactions are set up in such a way to obtain 50% of maximum of TrKB phosphorylation. (Kd = 50 ng/ml (0.0018 uM) [8,9].
4)	Receptor Internalization		BDNF_TrKB2*_clx => Int_BDNF_TrKB2*_clx	kf = 0.01 /sec kb = 0 /sec	NGF/BDNF complex with Trk is rapidly internalized [11].
5)	Receptor Cycling		Int_BDNF_TrKB2*_clx -> TrKB	kf=0.001 /sec, kb=0.001 /sec	Assumed
6)	Shc Phosphorylation		Shc + BDNF_TrKB2*_clx -> BDNF_TrKB2*_clx + Shc*	Km = 0.8333 uM, kcat = 0.3 /sec.	Shc has comparable association characteristics with both EGF-R and TrK-R [12] and so we have taken the rates from DOQCS.
7)	Dephosphorylation of Shc*		Shc* -> Shc	kf = 0.2 /sec, kb =0 /sec	It gives a reasonable dose response curve.
8)	PLC-γ phosphorylation		PLC-γ + BDNF_TrKB2*_clx -> BDNF_TrKB2*_clx + PLC-γ*	Km =0.3 uM, kcat = 0.5 /sec	Trk exhibits higher affinity for PLC-γ than EGF-R [12]. I had taken these values from DOQCS.
9)	PLC-gamma basal phosphorylation		PLC-γ + PLC-γ_basal -> PLC-γ_basal + PLC-γ*	Km =0.3 uM, kcat = 0.5 /sec	Trk exhibits higher affinity for PLC-γ than EGF-R [12]. I had taken these values from DOQCS.
10)	Dephosphorylation of PlC-gamma*		PLC-gamma* -> PLC-gamma	kf = 0.07; kb = 0 /sec	DOQCS
11)	Grb2 bind Shc*		Grb2 + Shc* -> Shc*-Grb2	kf = 1 /sec/uM, kb = 1 /sec	Assumed
12)	Formation of Grb2-Shc*_Gab1		Shc*-Grb2 + Gab1 -> Shc*_Grb2_Gab1	kf = 0.3 /sec/uM, kb = 1 /sec	Biomodels
13)	PI3K activation by Shc*_Grb2_Gab1 complex		Shc*_Grb2_Gab1 + PI3K -> Shc*_Grb2_Gab1_PI3K_clx	kf = 5 /sec/uM, kb = 0.08 /sec	The Kd of the SH2 domains of PI3K ranged from 0.98-1.4 * 10^-1 /sec [13].
14)	PI3K activation by Ras-GTP		Ras-GTP + PI3K -> Ras-GTP_PI3K	kf = 1.8 /sec/uM, kb = 5 /sec	Kd = 2.8 ± 0.4 μM [14]
15)	PIP3 formation		PIP2 + Shc*_Grb2_Gab1_PI3K_clx -> Shc*_Grb2_Gab1_PI3K_clx + PIP3	Km = 4 uM, kcat = 4 /sec	[15]
16)	PIP2 formation		PIP3 + PTEN -> PTEN + PIP2	Km = 0.08 uM, kcat = 5.5 /sec	[16]
17)	PIP3 basal formation		PI3K -> PI3K_basal	kf = 0.00068 /sec, kb = 0.45 /sec	The level of Ptdlns(3,4,5)P 3 in vivo increases 10 to 100-fold within 30 seconds of stimulation with insulin or growth factors [17]. So, I set the basal rate which gives around 12 fold activation in presence of bdnf stimulus .
18)	Basal PI3K activity		PIP2 + PI3K_basal -> PI3K_basal	Km = 4 uM, kcat = 4 /sec	[15]
AKT Signaling
Molecule	Concentration	Buffered	Notes
PDK1	1 uM	No	[16]
AKT	0.2 uM	No	[18]
PP2A	0.15 uM	No	[19]
PIP3_PDK2	0.003 uM.	No	[16]
TSC1-TSC2	1 uM	No	Abundant TSC2 expression was detected in the adult cerebellum, hippocampus, and olfactory bulb [20].
Rheb-GTP	1 uM	No	[21]
	Specification		Binding/Enzymatic Reaction	Rates	Notes
1)	PDK1 tranclocation		PIP3 + PDK1 -> PIP3_PDK1	kf = 0.7 /sec/uM , kb = 0.98 /sec	Kd = 1-2 uM [22]
2)	AKT translocation		PIP3 + AKT ->PIP3_AKT	kf = 45 /sec/uM, kb = 0.089 /sec	Kd = 1.54 +- 0.44 * 10^8 M^-1 (0.0065 uM) [23]
3)	Partial AKT activation (Thr308)		PIP3_AKT + PIP3_PDK1 -> PIP3_PDK1 + PIP3_AKT_thr308	Km = 0.4 uM, kcat = 10 /sec	Km = 80 uM kcat = 20 /sec [24]. These rates show a slower timecourse as given in [25] but we increased the rates to obtain the faster timecourse [26,27]
4)	Dephosphorylation of AKT*		PIP3_AKT_thr308 + PP2A -> PP2A + PIP3_AKT	Km = 4.8 um, kcat = 1.8 /sec	Km = 8.8 uM kcat = 0.037 /sec [16]. These rates show a slower timecourse as given in [25] but we increased the rates to obtain the faster timecourse [26,27].
5)	Fully AKT activation (Ser473)		PIP3_AKT_thr308+ PIP3_PDK2 -> PIP3_PDK2 + PIP3_AKT_t308_s473	Km = 0.8 uM, kcat = 20/sec	Km = 80 uM kcat = 20 /sec [16]. These rates show a slower timecourse as given in [25] but we increased the rates to obtain the faster timecourse [26,27].
6)	Dephosphorylation of AKT**		PIP3_AKT_t308_s473 + PP2A -> PIP3_AKT_thr308 + PP2A	Km = 4.8 um, kcat = 1.8 /sec	Km = 48 uM kcat = 0.04 /sec [16]. These rates show a slower timecourse as given in [25] but we increased the rates to obtain the faster timecourse [26,27].
7)	Phosphorylation of TSC1-TSC2		TSC1-TSC2 + PIP3_AKT_t308_s473 -> PIP3_AKT_t308_s473 + TSC1-TSC2*	Km = 10.3 uM, kcat=6 /sec	PMID: 8179591 (Km = 9.3 uM and Vmax = 7.3 umol/min/mg [28].
8)	Dephosphorylation of TSC1-TSC2*		TSC1-TSC2* -> TSC1-TSC2	kf = 0.01 /sec, kb =0	It gives a reasonable fold activation of TSC1-TSC2 when bdnf stimulus is given.
9)	Hydrolysis of Rheb-GTP by TSC1-TSC2		Rheb-GTP + TSC1-TSC2 -> TSC1-TSC2 + Rheb-GDP	Km = 0.3 uM, kcat=20 /sec	Assumed
10)	Converstion of Rheb-GDP to Rheb-GTP		Rheb-GDP -> Rheb-GTP	kf = 0.2 /sec, kb=0	Made the reaction fast so that Rheb-GTP is present in large amount.
S6 Kinase Model
Molecule	Concentration	Buffered	Notes
TOR-clx	0.6 uM	No	0.45 mg/ml [29]
Rheb-GTP	1 uM	No	[21]
S6K	0.17 uM	No	Assumed
PDK1	1 uM	No	[16]
inact_40S	0.02 uM	Yes	[30,31]
40S_basal	0.0001 uM	No	The concentration is fixed to give around 20% basal activity [31].
PP2A	0.15 uM	No	[19]
	Specification		Binding/Enzymatic Reaction	Rates	Notes
1)	Activation of TOR-clx		TOR-clx + Rheb-GTP -> TOR_Rheb-GTP_clx	kf = 6 /sec/uM, kb = 3 /sec	We got an idea of activation ratios from [21]. We had estimated Tau < 10 min because the step after it has Tau of 12.5 min. So, I make this reaction fast.
2)	Cluster S6K phos		S6K + MAPK* -> MAPK* + S6K*	Km = 17.3 uM, kcat = 1 /sec	[32]
3)	Basal cluster S6K phosphorylation		S6K -> S6K*	kf = 0.01 /sec, kb = 0	[33]
3)	S6K phos by mTOR		S6K* + TOR1_Rheb_GTP_clx -> TOR1_Rheb_GTP_clx + S6K_thr-412	Km = 0.8 uM, kcat = 0.06 /sec	[34]
4)	40S (S6) phosphorylation by S6k (mTOR)		inact_40S + S6K_thr-412 -> S6K_thr-412 + 40S	Km = 0.25 uM, kcat = 0.01 /sec	[35,36]
5)	S6K phosphorylation by PDK1		S6K_thr-412 + PDK1 -> S6K_thr-252 + PDK1	Km = 10 uM, kcat = 1 /sec	[16]
6)	40S (S6) phosphorylation by S6K (mTOR and PDK1)		inact_40S + S6K_thr-252 -> S6K_thr-252 + 40S	Km = 1 uM, kcat = 0.08 /sec	[36]
7)	40S (S6) phosphorylation basal		inact_40S + 40S_basal -> 40S_basal + 40S	Km = 0.25 uM, kcat = 0.1 /sec (PMID: 1737763, PMID: 16213157 )	[36]
8)	40S Dephosphorylation		40S -> 40S_basal	kf = 0.007 /sec, kb =0	It gives a reasonable fold activation of phosphorylated 40S when bdnf stimulus is given.
9)	Dephosphorylation of S6K*		S6K* + PP2A -> S6K + PP2A	Km = 8.8 uM, kcat = 1 /sec	[16]
10)	Dephosphorylation of S6K_thr-412		S6K_thr-412 + PP2A -> S6K* + PP2A	Km = 8.8 uM, kcat = 1 /sec	[16]
11)	Dephosphorylation of S6K_thr-252		S6K_thr-252 + PP2A -> S6K_thr-412 + PP2A	Km = 8.8 uM, kcat = 1 /sec	[16]
4E-BP signaling
Molecule	Concentration	Buffered	Notes
eIF4E-BP	0.27 uM	No	[37]
eIF4G	0.04 uM	No	There are around 2*10^6 molecules/cell [38]. The initial cell diameter of HeLa cells is estimated to be approx 20-30 uM, which I used to calculate eIF4G concentration in uM.
eIF4A	0.2 uM	No	There are around 10*10^6 molecules/cell [38]. The initial cell diameter of HeLa cells is estimated to be approx 20-30 uM, which I used to calculate eIF4A concentration in uM.
mRNA	0.08 uM	No	mRNA comprises of approximately 1-5 % of total cellular RNA. There are ~10,000 different mRNAs expressed in the cell soma of hippocampal neurons. And only, ~5% of the mRNAs can be targeted to the dendritic domain [39].
	Specification		Binding/Enzymatic Reaction	Rates	Notes
1)	Activation of TOR-clx		TOR-clx + Rheb-GTP -> TOR_Rheb-GTP_clx	kf = 6 ; kb = 3	We got an idea of activation ratios from [21]. We had estimated Tau < 10 min because the step after it has Tau of 12.5 min. So, I make this reaction fast.
2)	4E-BP phospho at Thr 37 and Thr 46 by TOR		eIF4E-BP + TOR_Rheb_GTP_clx -> TOR_Rheb_GTP_clx + eIF4E-BP_thr37_46	Km = 1.8 uM kcat = 1 /sec.	The affinity of mTOR for 4E-BP1 is lower in compare to S6K so we fixed the Km for this reaction at higher Km as per the obtained Km value for S6K [40]. Activation of the S6 kinase and disruption of the 4E-BP1-eIF-4E complex follow the same time course [40]. So, I follwed the same time course of activation of of the S6 kinase. mTOR phosphorylate 4E-BP on Thr37 and Thr46.
3)	4E-BP phospho at Ser 65 by MAPK		eIF4E_4E-BP_thr37_46 + MAPK* -> MAPK* + eIF4E_4E-BP_thr37_46_s65	Km = 17.9 uM ; kcat = 0.16 /sec	[32]
4)	Dissociation of eIF4E-BP_thr37_46		eIF4E-BP_thr37_46 -> eIF4E + 4E-BP_thr37_46	kf = 1/sec, kb = 0.1 /sec/uM	Kd = 0.01 uM - 0.1 uM [41]
5)	Phosphorylation of 4E-BP_thr37_46		4E-BP_thr37_46 + MAPK* -> MAPK* + 4E-BP_thr37_46_s65	Km = 17.9 uM ; kcat = 0.16 /sec	[32]
6)	Dissociation of eIF4E_4E-BP_thr37_46_s65		eIF4E_4E-BP_thr37_46_s65 -> eIF4E + 4E-BP_thr37_46_s65	kf = 4/sec, kb = 1 /sec/uM	Kd = 0.25 uM [41]
7)	Dephosphorylation of eIF4E_4E-BP_thr37_46_s65		eIF4E_4E-BP_thr37_46_s65 + PP2A -> PP2A + eIF4E-BP_thr37_46	Km = 8.8 uM; kcat = 1 /sec	[16]
8)	Dephosphorylation of eIF4E-BP_thr37_46		eIF4E-BP_thr37_46 + PP2A -> PP2A + eIF4E-BP	Km = 8.8 uM; kcat = 1 /sec	[16]
9)	Dephosphorylation of 4E-BP_thr37_46_s65		4E-BP_thr37_46_s65 + PP2A -> PP2A + 4E-BP_thr37_46	Km = 8.8 uM; kcat = 1 /sec	[16]
10)	Dephosphorylation of 4E-BP_thr37_46		4E-BP_thr37_46 + PP2A -> PP2A + 4E-BP	Km = 8.8 uM; kcat = 1 /sec	[16]
11)	Phosphorylation of 4E-BP		4E-BP + TOR1_Rheb_GTP_clx -> TOR1_Rheb_GTP_clx + 4E-BP_thr37_46	Km = 1.8 uM kcat = 1 /sec.	[40]
12)	EIF4E-BP1 Complex		4E-BP + eIF4E -> eIF4E-BP	kf = 50 and kb = 0.15	Kd = 3x10(-9) M (0.003 uM) [42]; tau is 17 sec [42]
13)	Formation of eIF4G_A_clx		eIF4G + eIF4A -> eIF4G-A_clx	kf = 0.05; kb = 0.0001	Binding of eIF4A to eIF4G is weaker than that of eIF4E to eIF4G [43].
14)	Formation of eIF4F_clx		eIF4G-A_clx + eIF4E -> eIF4F	kf = 30 and kb = 0.1	Kd = 2×10-9 M [44]
15)	eIF4F_mRNA complex		eIF4F + mRNA -> eIF4F_mRNA_clx	kf = 0.2, kb = 0.077	Kd = 260 nM (0.26 uM) [45] Tau = 2.67 sec [42]
CaMKIII signaling
Molecule	Concentration	Buffered	Notes
CaMKIII	0.06 uM	No	Assumed
eEF2	0.5 uM	No	[46,47,48]
S6K_basal	0.001 uM	No	Assumed (set it at some low value)
	Specification		Binding/Enzymatic Reaction	Rates	Notes
1)	Binding of Calmodulin-Calcium to CaMKIII		CaM-Ca4 + CAMKIII -> CaMKIII_CaM-Ca4	kf = 0.99 /sec/uM, kb = 0.09 /sec	Kd = <1nM [47]
3)	Phosphorylation of eEF2		CaMKIII_CaM-Ca4 + eEF2 -> eEF2thr-56 + CaMKIII_CaM-Ca4	Km = 2 uM kcat = 10 /sec	[47]
4)	Dephosphorylation of eEF2thr-56		eEF2thr-56 + PP2A -> eEF2 + PP2A	Km = 8.8 uM, kcat = 0.47 /sec	[16]
5)	Phosphorylation of CaMKIII		CaMKIII + S6K_thr-252 -> CaMKIII* + S6K_thr-252	Km = 1 uM ; kcat = 1 /sec	BRENDA
6)	Basal activation of CaMKIII		CaMKIII + Basal -> CaMKIII* + S6K_thr-252	Km = 1 uM ; kcat = 10 /sec	BRENDA
40S Complex model
Molecule	Concentration	Buffered	Notes
Quaternary Complex	0.047 uM	No	[49]
60S	0.068 uM	Yes	seem to be approximately stoichiometric with the number of 40S ribosomes
AA	0.1 uM	Yes	Sufficient supply assumed
Basal_ Translation	0.0002 uM	No	There is around 40% of the overall increase in protein syntheis which is mTOR independent [50]. Accordingly, we set the concentration for this pool.
	Specification		Binding/Enzymatic Reaction	Rates	Notes
1)	Binding of Quaternary Complex(Q) and 40S ribosome(R)		Q + R -> Q_R	kf = 0.48 /sec/uM, kb = 0.5 /sec	Kd = 1.06 uM [49]
2)	Binding of Q_R and mRNA(M)		QR + M -> Q_R_M	kf = 0.49 /sec/uM, kb = 0.0045 /sec	Kd = 0.009 uM [49]
3)	Binding of R and M		R + M -> R_M	kf = 1.28 /sec/uM, kb = 0.719 /sec	Kd = 0.56 uM [49]
4)	Binding of R_M and Q		R_M + Q -> 40Scomplex	kf = 0.098 /sec/uM, kb = 0.00169 /sec	Kd = 0.017 uM [49]
5)	Binding of 40Scomplex and 60S		40Scomplex + 60S -> 80S_ribo_clx	kf = 1 /sec/uM, kb = 0.9 /sec	The reaction is fast (>1 /min) [51]
6)	Elongation		80S_ribo_clx + eEF2 -> Translational_complex	kf = 40 /sec/uM, kb =10 /sec	Kd = 0.26 +/- 0.04 uM [52]
7)	Translation_Complex_Synthesis		AA + Translational_complex -> Translational_complex + peptide	Km = 0.055 uM kcat = 0.02 /sec	We have estimated the parameters by assuming a protein synthesis rate of 1 protein every 75 seconds from each translation complex.
8)	Basal_Translation_Synthesis		AA + Basal_Translation -> peptide	Km = 0.055 uM kcat = 0.02 /sec	We have estimated the parameters by assuming a protein synthesis rate of 1 protein every 75 seconds from each translation complex.
8)	Protein formation		peptide -> protein	kf = 0.1 /sec kb =0.001 /sec	Assumed
9)	Protein degradation		protein -> degraded protein	kf = 1 /sec, kb =0 /sec	We lacked direct data for the degradation rates for most proteins. We therefore assigned a generic degradation rate of 1/sec for convenience.
		.
