# Supplementary material for: Signaling Logic of Activity-Triggered Dendritic Protein Synthesis: An mTOR Gate But Not a Feedback Switch
Source: PubMed Central journal article supplement (PMC2647780; doi:10.1371/journal.pcbi.1000287), 2009-02-13
Supplement: pcbi.1000287.s006.pdf [file pcbi.1000287.s006.pdf]

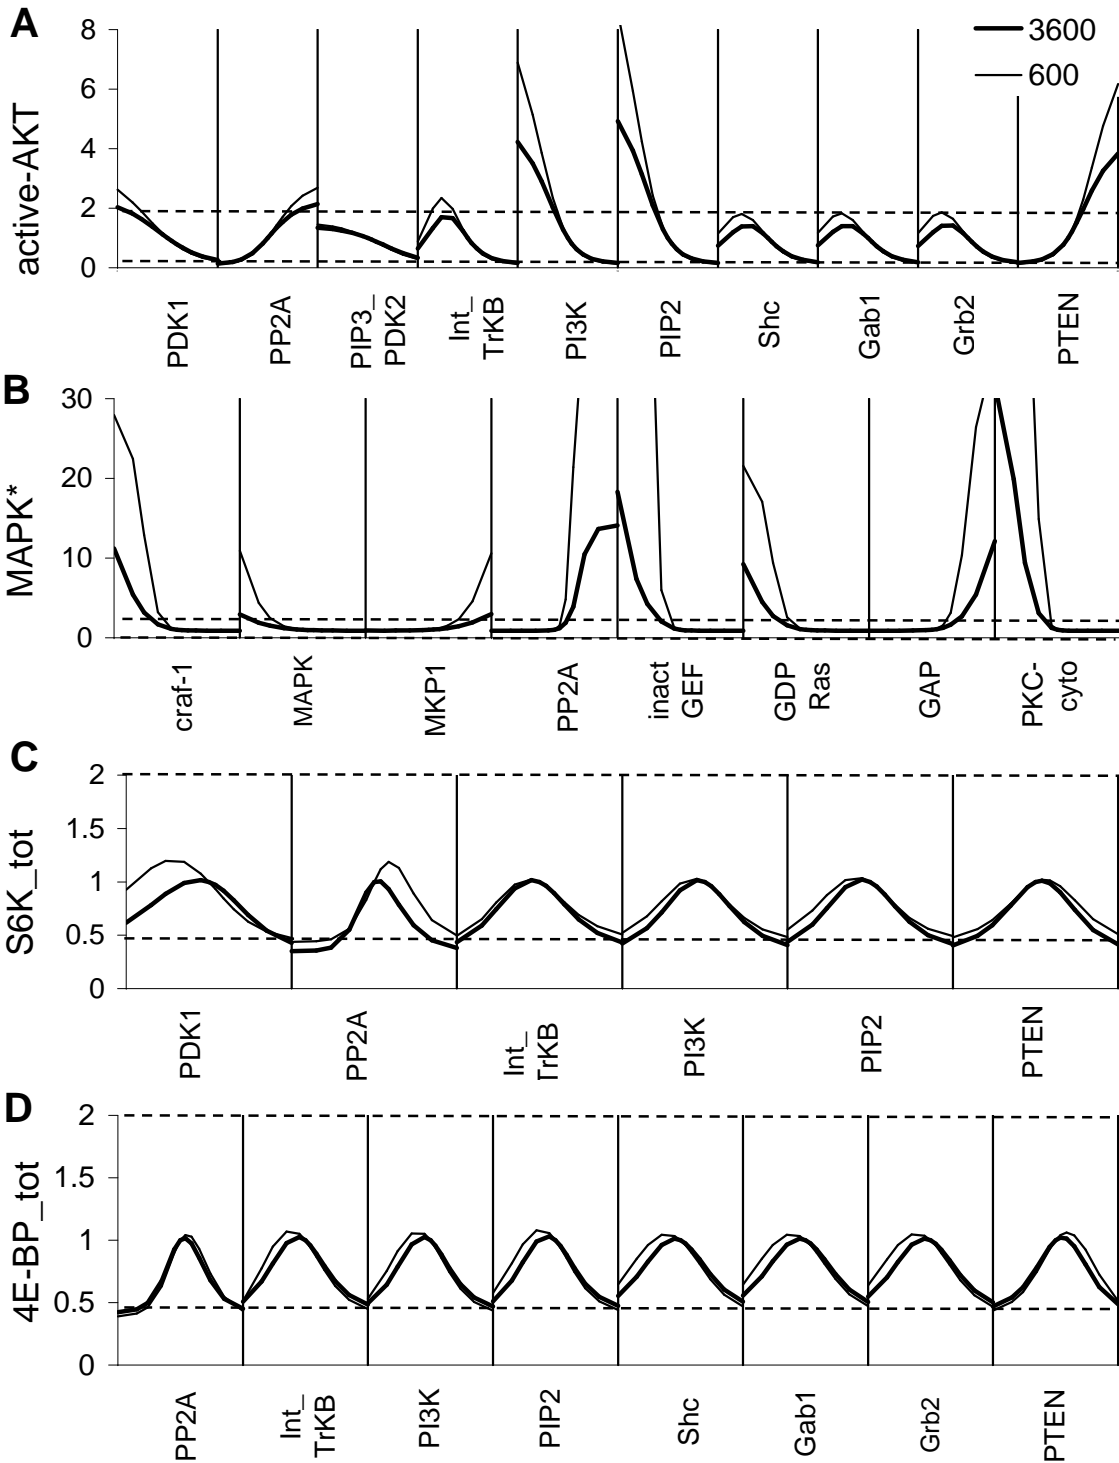

**Supplementary Figure S3:**

Parameter sensitivity analysis. We systematically varied the total concentrations of each molecule (Colnit) from 0.1 to 10 fold the original model value. We plotted active AKT, MAPK\*, S6K\_tot (sum total of the phosphorylated forms of S6K) and 4E-BP\_tot (sum total of the phosphorylated forms of 4E-BP).
