# Supplementary material for: Signaling Logic of Activity-Triggered Dendritic Protein Synthesis: An mTOR Gate But Not a Feedback Switch
Source: PubMed Central journal article supplement (PMC2647780; doi:10.1371/journal.pcbi.1000287), 2009-02-13
Supplement: pcbi.1000287.s010.pdf [file pcbi.1000287.s010.pdf]

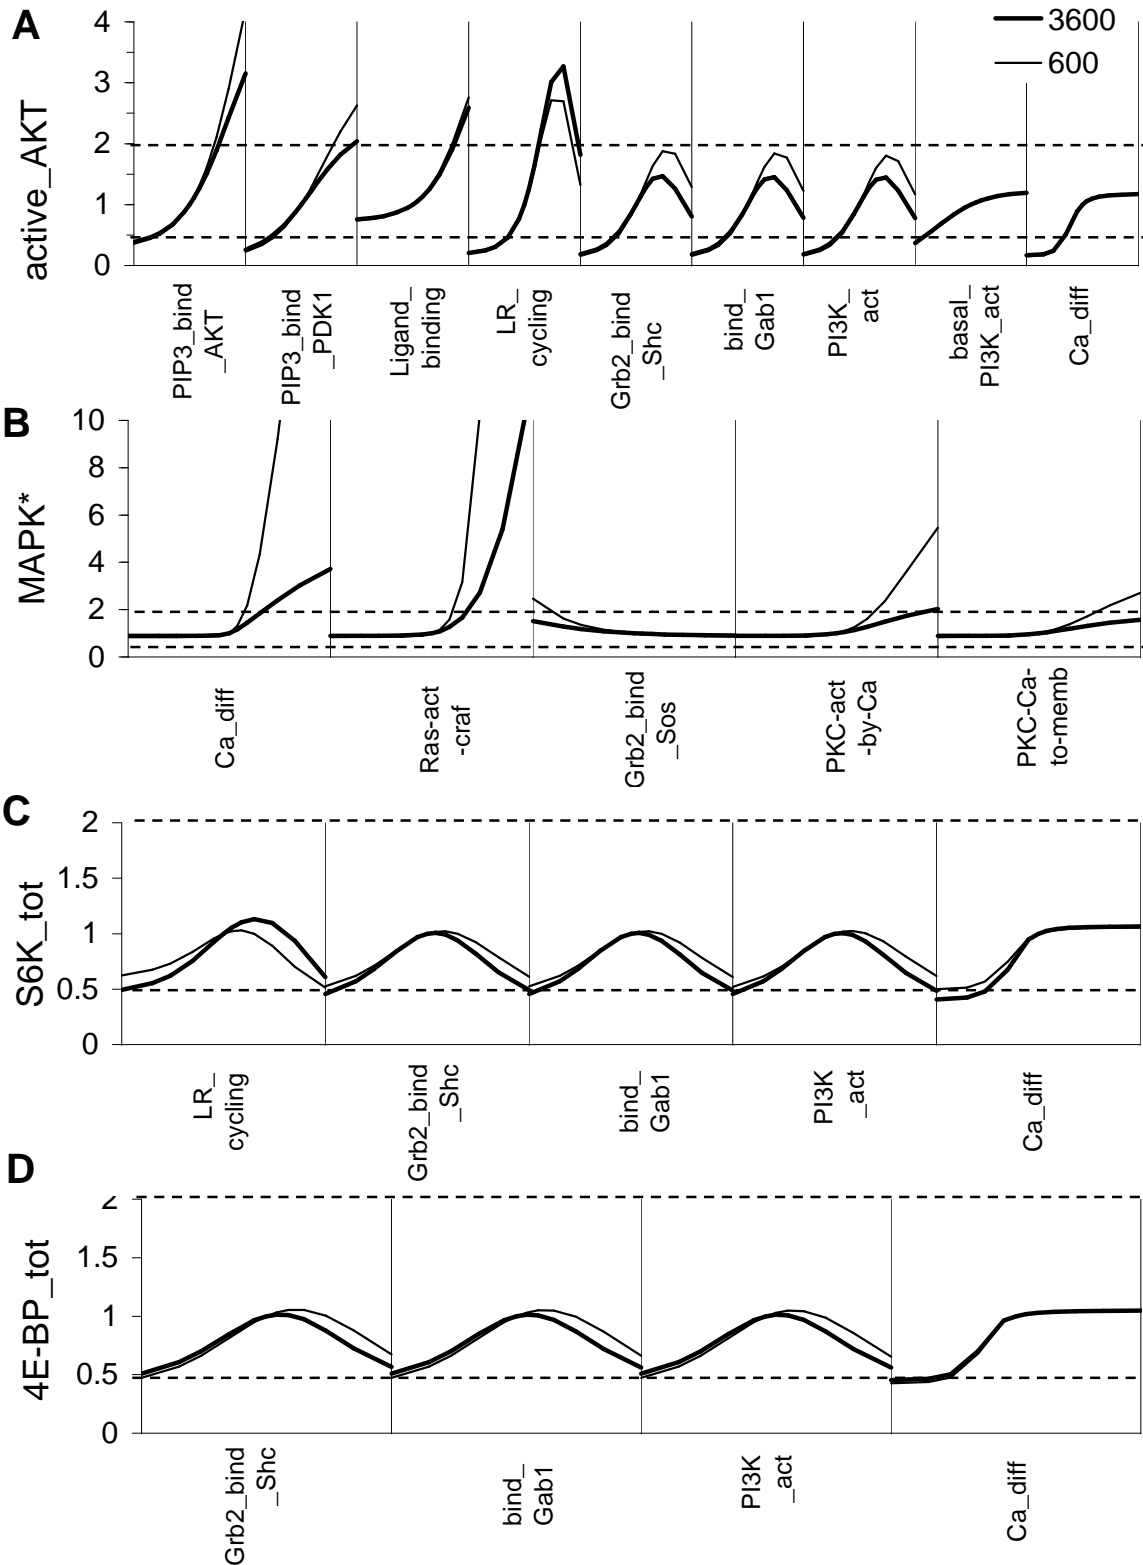

**Supplementary Figure S7:**

Parameter sensitivity analysis. We systematically varied the Kb of each molecule.
