# Supplementary material for: Signaling Logic of Activity-Triggered Dendritic Protein Synthesis: An mTOR Gate But Not a Feedback Switch
Source: PubMed Central journal article supplement (PMC2647780; doi:10.1371/journal.pcbi.1000287), 2009-02-13
Supplement: pcbi.1000287.s011.pdf [file pcbi.1000287.s011.pdf]

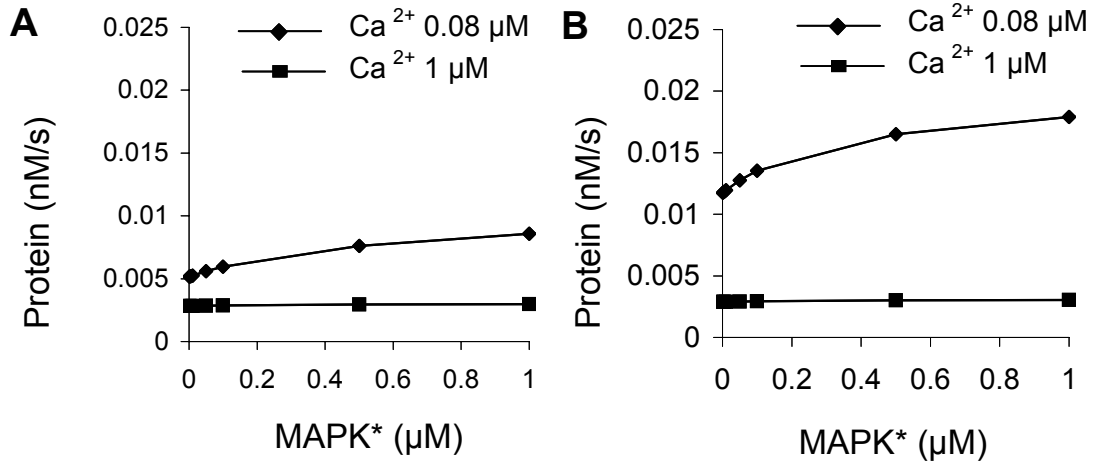

**Supplementary Figure S8:**

Dose response of protein synthesis rate as a function of active MAPK. BDNF is buffered at basal level (0.05  $\mu\text{M}$  Figure S8 A) and at stimulated level (3.7 nM, Figure S8 B). The basal kinase activity is 0.01 /sec. There is a weak dependence of protein synthesis rate on MAPK activity.
