# Supplementary material for: Signaling Logic of Activity-Triggered Dendritic Protein Synthesis: An mTOR Gate But Not a Feedback Switch
Source: PubMed Central journal article supplement (PMC2647780; doi:10.1371/journal.pcbi.1000287), 2009-02-13
Supplement: pcbi.1000287.s012.pdf [file pcbi.1000287.s012.pdf]

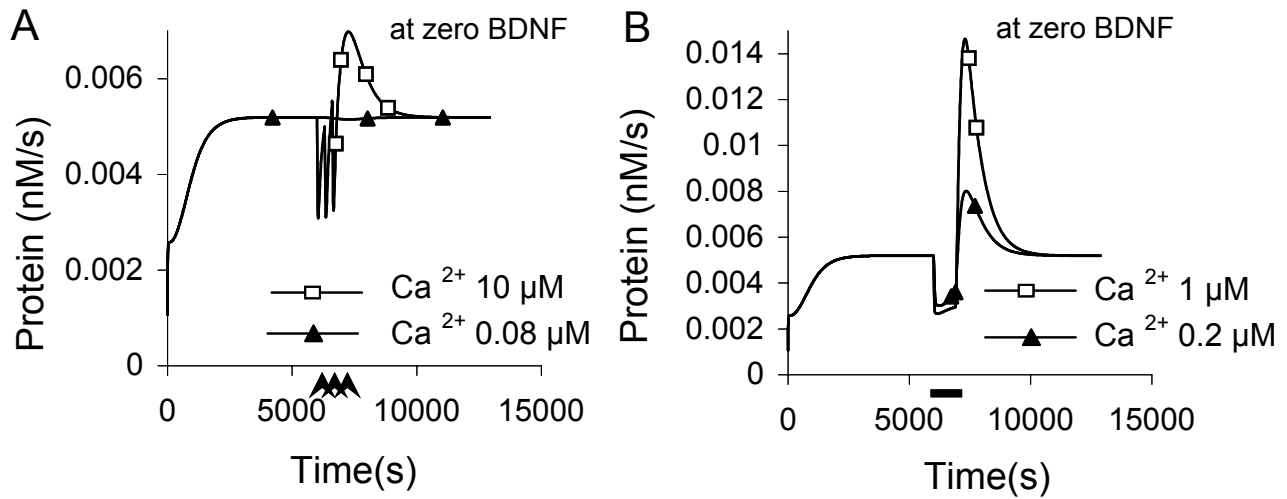

**Supplementary Figure S9:**

Response to LTP and LTD stimuli.

A: protein synthesis for the LTP stimuli and

B: protein synthesis for the LTD stimuli.

LTP stimulus was 3 Ca<sup>2+</sup> peaks of 10 μM for 1 sec each, separated by 5 min

(Arrows below time axis in A). Filled triangles indicate runs where the Ca<sup>2+</sup> remained at baseline (0.08 μM) and open squares indicate Ca<sup>2+</sup> at 10 μM.

The LTD stimulus (Bar below time axis in B) was a single pulse of Ca<sup>2+</sup> for 900 sec at 1 μM (open squares) and 0.2 μM Ca<sup>2+</sup> (filled triangles).

The simulations are with zero BDNF.
